Development 136, 3377 (2009) doi:10.1242/dev.043802

## Stage-dependent modes of Pax6-Sox2 epistasis regulate lens development and eye morphogenesis

**April N. Smith, Leigh-Anne Miller, Glenn Radice, Ruth Ashery-Padan and Richard A. Lang**

There was an error published in *Development* **136**, 2977-2985.

The acknowledgements should have mentioned the Binational Science Foundation. The corrected acknowledgements section appears in full below.

The authors apologise to readers for this mistake.

We thank Mr Paul Speeg for excellent technical assistance. We are indebted to Dr Hans Arnheiter for providing the anti-Mitf antibodies. This work was supported by NIH RO1s EY10559, EY15766, EY16241 and EY17848, and by funds from the Abrahamson Pediatric Eye Institute Endowment at Children's Hospital Medical Center of Cincinnati (R.A.L.). Research in the laboratories of R.A.L. and R.A.-P. is supported by the Binational Science Foundation.
